# Supplementary material
Source: PubMed Central journal article supplement (PMC5692586)
Supplement: pnas.201713074SI.pdf [file pnas.201713074SI.pdf]

# Supporting Information

Barbash et al. 10.1073/pnas.1713074114

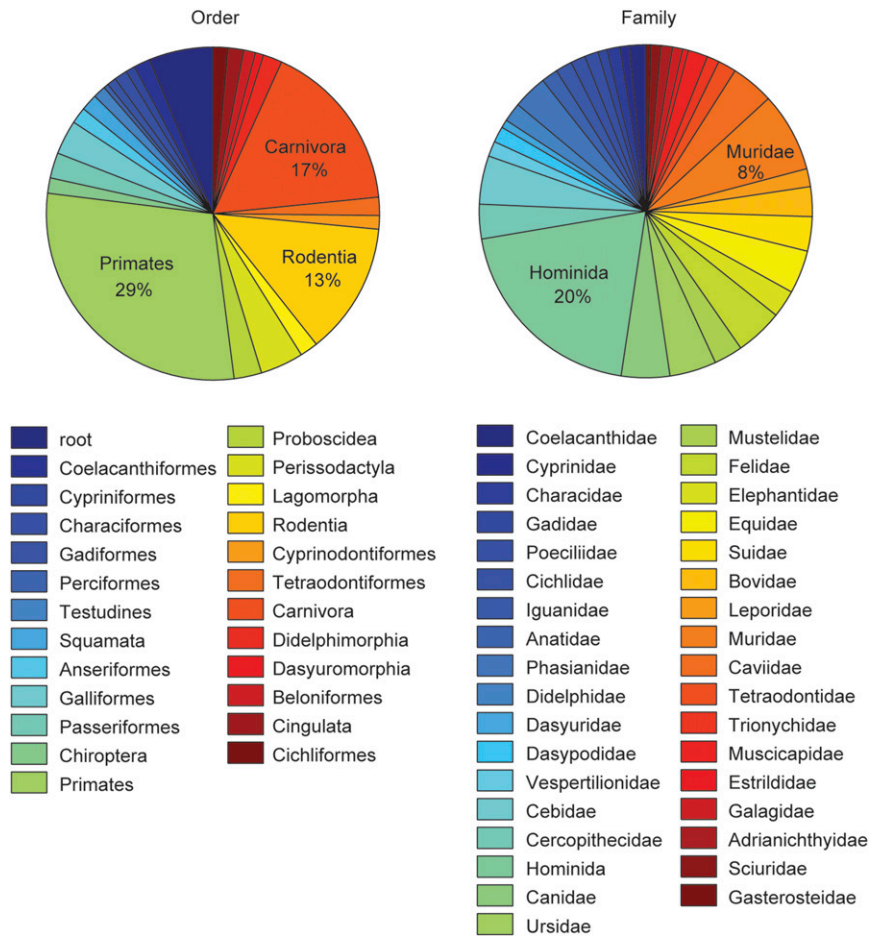

**Fig. S1.** Organisms order and family frequencies in the phylogenetic analysis. As noted, analysis was made for any protein pair that had an ortholog for at least one human GPCR and one human RAMP. Pie charts showing the frequencies in which organisms of any kind of order and family appeared in our analysis. As expected from our human-centered analysis, most organisms belong to the order of primates and the family of Hominidae.

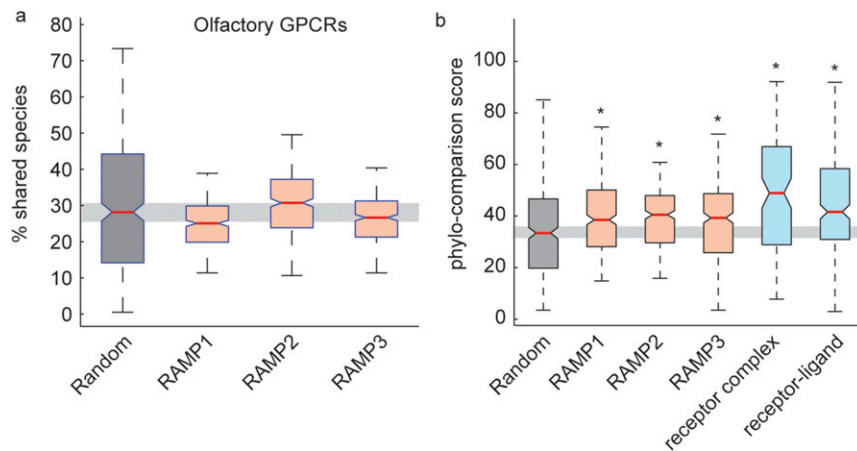

**Fig. 52.** (A) Boxplot (as in Fig. 1) of percent of shared species between olfactory GPCRs and each of the three RAMPs shows no difference from that expected by chance. (B) Boxplot (as in Fig. 1) for global phylogenetic score as calculated by phylo-comparison for all GPCRs.

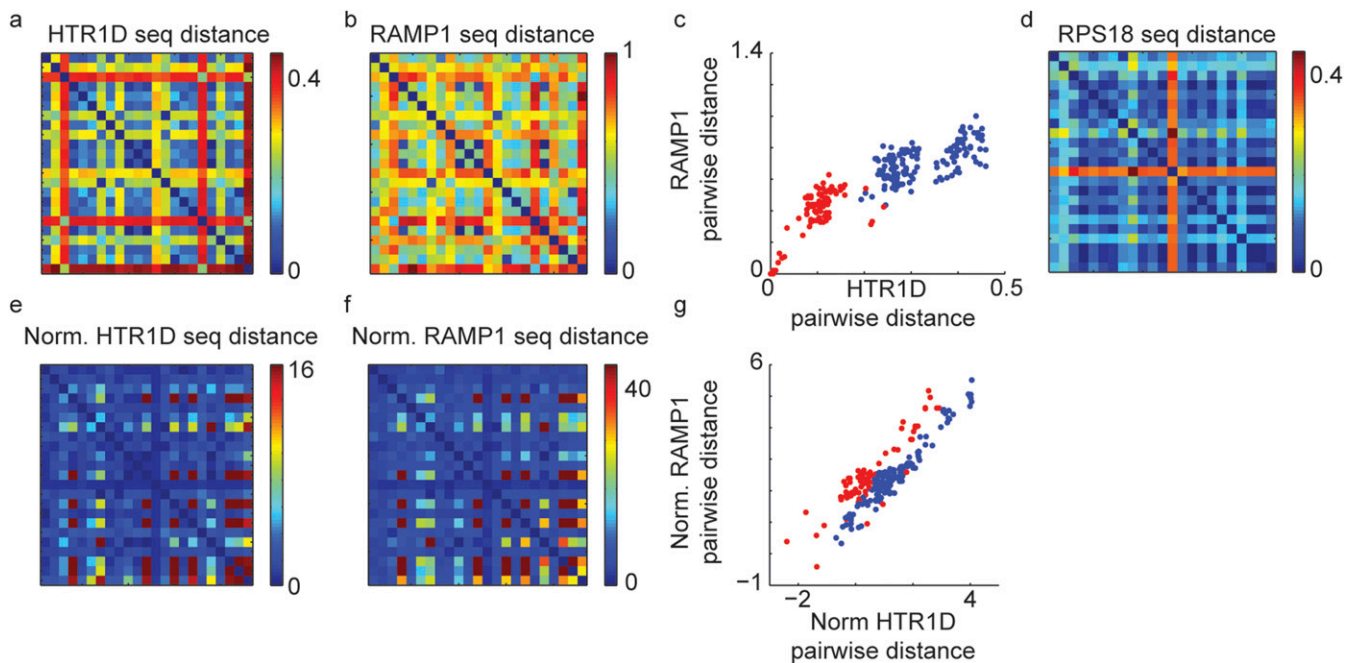

**Fig. 53.** Effect of normalization by 18S rRNA; HTR1D (a GPCR) and RAMP1 gene pairs as an example. (A and B) Color-coded matrices of phylogenetic resemblance based on amino acid sequence distance between organisms for (A) HTR1D and (B) RAMP1. (C) Scatter plot of between-species phylogenetic resemblance for RAMP1 versus HTR1D shows clusters of intraspecies (red) and interspecies (blue) family relationship. (D) The 18S rRNA distance matrix. (E and F) Color-coded 18S rRNA normalized (Norm.) matrices of phylogenetic resemblance for (E) HTR1D and (F) RAMP1. (G) Scatter plot, as in C, after normalization with 18S rRNA matrix. Note that, before normalization, interspecies and intraspecies relationships govern the correlation, while, after normalization, they do not.

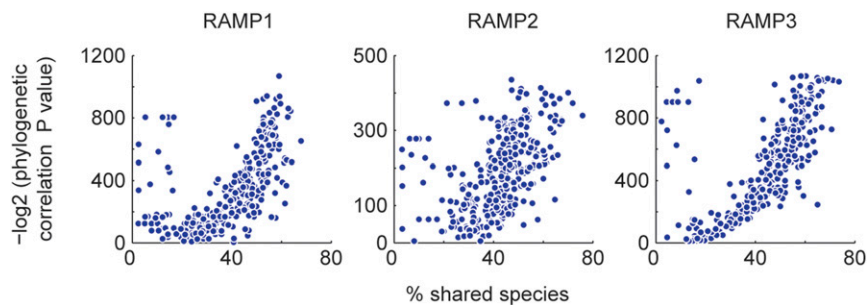

**Fig. 54.** Similar pattern of coevolution, across GPCR–RAMP pairs, based on percent shared species and correlation in phylogenetic trees, for all three RAMPs. Pearson's  $r = 0.56$ ,  $P = 2.51 \times 10^{-22}$  for RAMP1;  $r = 0.48$ ,  $P = 1.63 \times 10^{-20}$  for RAMP2; and  $r = 0.61$ ,  $P = 1.36 \times 10^{-25}$  for RAMP3.

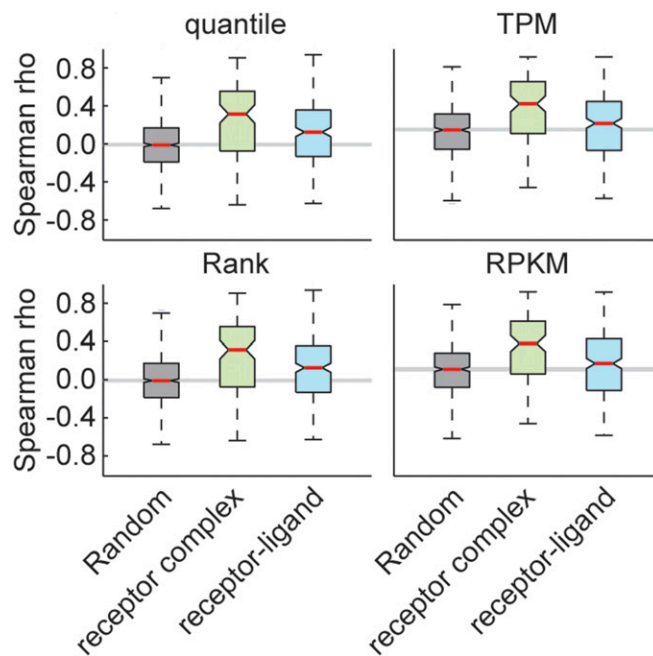

**Fig. 55.** Boxplot (as in Fig. 4) of coexpression, measured as Spearman correlation coefficient for four different methods for normalizing the expression data, show similar results.

**Table S1.** Forty-four organisms in which an orthologous gene was identified for at least one human GPCR and one human RAMP

|                              |                                |                               |                               |                                      |
|------------------------------|--------------------------------|-------------------------------|-------------------------------|--------------------------------------|
| <i>Latimeria chalumnae</i>   | <i>Gallus gallus</i>           | <i>Pan troglodytes</i>        | <i>Equus caballus</i>         | <i>Pelodiscus sinensis</i>           |
| <i>Danio rerio</i>           | <i>Meleagris gallopavo</i>     | <i>Pongo abelii</i>           | <i>Sus scrofa</i>             | <i>Anolis carolinensis</i>           |
| <i>Astyanax mexicanus</i>    | <i>Sarcophilus harrisii</i>    | <i>Homo sapiens</i>           | <i>Bos taurus</i>             | <i>Otolemur garnettii</i>            |
| <i>Gadus morhua</i>          | <i>Dasyptus novemcinctus</i>   | <i>Canis familiaris</i>       | <i>Oryctolagus cuniculus</i>  | <i>Takifugu rubripes</i>             |
| <i>Xiphophorus maculatus</i> | <i>Callithrix jacchus</i>      | <i>Ailuropoda melanoleuca</i> | <i>Mus musculus</i>           | <i>Spermophilus tridecemlineatus</i> |
| <i>Oryzias latipes</i>       | <i>Macaca mulatta</i>          | <i>Mustela putorius furo</i>  | <i>Rattus norvegicus</i>      | <i>Poecilia formosa</i>              |
| <i>Oreochromis niloticus</i> | <i>Papio anubis</i>            | <i>Felis catus</i>            | <i>Cavia porcellus</i>        | <i>Myotis lucifugus</i>              |
| <i>Anas platyrhynchos</i>    | <i>Gorilla gorilla gorilla</i> | <i>Loxodonta africana</i>     | <i>Monodelphis domestica</i>  | <i>Taeniopygia guttata</i>           |
| <i>Ficedula albicollis</i>   | <i>Chlorocebus sabaeus</i>     | <i>Gasterosteus aculeatus</i> | <i>Tetraodon nigroviridis</i> |                                      |

**Table S2. Organisms in OMA groups of orthologous genes for the three RAMPs**

| RAMP1                          | RAMP2                          | RAMP3                                |
|--------------------------------|--------------------------------|--------------------------------------|
| <i>Ailuropoda melanoleuca</i>  | <i>Ailuropoda melanoleuca</i>  | <i>Ailuropoda melanoleuca</i>        |
| <i>Anas platyrhynchos</i>      | <i>Bos Taurus</i>              | <i>Anas platyrhynchos</i>            |
| <i>Anolis carolinensis</i>     | <i>Callithrix jacchus</i>      | <i>Anolis carolinensis</i>           |
| <i>Astyanax mexicanus</i>      | <i>Canis familiaris</i>        | <i>Astyanax mexicanus</i>            |
| <i>Callithrix jacchus</i>      | <i>Cavia porcellus</i>         | <i>Bos taurus</i>                    |
| <i>Canis familiaris</i>        | <i>Chlorocebus sabaues</i>     | <i>Callithrix jacchus</i>            |
| <i>Cavia porcellus</i>         | <i>Choloepus hoffmanni</i>     | <i>Canis familiaris</i>              |
| <i>Gallus gallus</i>           | <i>Dasyopus novemcinctus</i>   | <i>Cavia porcellus</i>               |
| <i>Chlorocebus sabaues</i>     | <i>Erinaceus europaeus</i>     | <i>Gallus gallus</i>                 |
| <i>Danio rerio</i>             | <i>Felis catus</i>             | <i>Dipodomys ordii</i>               |
| <i>Echinops telfairi</i>       | <i>Gorilla gorilla gorilla</i> | <i>Erinaceus europaeus</i>           |
| <i>Erinaceus europaeus</i>     | <i>Equus caballus</i>          | <i>Felis catus</i>                   |
| <i>Felis catus</i>             | <i>Homo sapiens</i>            | <i>Ficedula albicollis</i>           |
| <i>Ficedula albicollis</i>     | <i>Loxodonta africana</i>      | <i>Gadus morhua</i>                  |
| <i>Gadus morhua</i>            | <i>Macaca mulatta</i>          | <i>Gasterosteus aculeatus</i>        |
| <i>Gorilla gorilla gorilla</i> | <i>Monodelphis domestica</i>   | <i>Gorilla gorilla gorilla</i>       |
| <i>Equus caballus</i>          | <i>Nomascus leucogenys</i>     | <i>Equus caballus</i>                |
| <i>Homo sapiens</i>            | <i>Ochotona princeps</i>       | <i>Homo sapiens</i>                  |
| <i>Latimeria chalumnae</i>     | <i>Pan troglodytes</i>         | <i>Latimeria chalumnae</i>           |
| <i>Meleagris gallopavo</i>     | <i>Papio anubis</i>            | <i>Loxodonta africana</i>            |
| <i>Mus musculus</i>            | <i>Sus scrofa</i>              | <i>Macropus eugenii</i>              |
| <i>Mustela putorius furo</i>   | <i>Pongo abelii</i>            | <i>Macaca mulatta</i>                |
| <i>Myotis lucifugus</i>        | <i>Procavia capensis</i>       | <i>Meleagris gallopavo</i>           |
| <i>Nomascus leucogenys</i>     | <i>Pteropus vampyrus</i>       | <i>Monodelphis domestica</i>         |
| <i>Ochotona princeps</i>       | <i>Oryctolagus cuniculus</i>   | <i>Mus musculus</i>                  |
| <i>Oreochromis niloticus</i>   | <i>Rattus norvegicus</i>       | <i>Mustela putorius furo</i>         |
| <i>Oryzias latipes</i>         | <i>Ovis aries</i>              | <i>Nomascus leucogenys</i>           |
| <i>Pan troglodytes</i>         | <i>Sorex araneus</i>           | <i>Oreochromis niloticus</i>         |
| <i>Pelodiscus sinensis</i>     | <i>Tursiops truncatus</i>      | <i>Ornithorhynchus anatinus</i>      |
| <i>Sus scrofa</i>              |                                | <i>Oryzias latipes</i>               |
| <i>Poecilia Formosa</i>        |                                | <i>Otolemur garnettii</i>            |
| <i>Pteropus vampyrus</i>       |                                | <i>Pan troglodytes</i>               |
| <i>Rattus norvegicus</i>       |                                | <i>Papio anubis</i>                  |
| <i>Takifugu rubripes</i>       |                                | <i>Poecilia formosa</i>              |
| <i>Tetraodon nigroviridis</i>  |                                | <i>Pongo abelii</i>                  |
| <i>Tursiops truncatus</i>      |                                | <i>Rattus norvegicus</i>             |
| <i>Xenopus tropicalis</i>      |                                | <i>Sarcophilus harrisii</i>          |
| <i>Xiphophorus maculatus</i>   |                                | <i>Ovis aries</i>                    |
|                                |                                | <i>Spermophilus tridecemlineatus</i> |
|                                |                                | <i>Taeniopygia guttata</i>           |
|                                |                                | <i>Takifugu rubripes</i>             |
|                                |                                | <i>Tursiops truncatus</i>            |
|                                |                                | <i>Xenopus tropicalis</i>            |
|                                |                                | <i>Xiphophorus maculatus</i>         |

**Table S3. Receptor–ligand gene pairs used in the analysis**

| Receptor gene | Ligand gene |
|---------------|-------------|---------------|-------------|---------------|-------------|---------------|-------------|
| NOTCH1        | JAG1        | IL2RG         | IL4         | FGFR2         | FGF18       | BMPR1B        | BMP8        |
| NOTCH2        | JAG1        | IL13RA1       | IL4         | FGFR3         | FGF18       | BMPR2         | BMP8        |
| NOTCH3        | JAG1        | IL13RA2       | IL13        | FGFR4         | FGF18       | ACVR1         | BMP8        |
| NOTCH4        | JAG1        | IL4R          | IL13        | FGFR1         | FGF19       | ACVR2         | BMP8        |
| NOTCH2        | JAG2        | IL2RG         | IL13        | FGFR2         | FGF19       | ACVR2B        | BMP8        |
| NOTCH3        | JAG2        | CSF2RB        | IL3         | FGFR3         | FGF19       | BMPR1B        | BMP10       |
| NOTCH4        | JAG2        | CSF2RB        | IL5         | FGFR4         | FGF19       | BMPR2         | BMP10       |
| NOTCH1        | DLL1        | CSF2RB        | CSF2        | NTRK1         | NGFB        | ACVR1         | BMP10       |
| NOTCH2        | DLL1        | IFNGR2        | IFNG        | NGFR          | NGFB        | ACVR2         | BMP10       |
| NOTCH3        | DLL1        | IL10RB        | IL10        | NGFR          | BDNF        | ACVR2B        | BMP10       |
| NOTCH4        | DLL1        | IL17R         | IL17        | NTRK1         | NTF3        | BMPR1B        | BMP15       |
| NOTCH2        | DLL3        | IL12RB2       | IL12A       | NTRK2         | NTF3        | BMPR2         | BMP15       |
| NOTCH3        | DLL3        | IL12RB2       | IL12B       | NTRK3         | NTF3        | ACVR1         | BMP15       |
| NOTCH4        | DLL3        | IFNAR2        | IFNA4       | NGFR          | NTF3        | ACVR2         | BMP15       |
| NOTCH2        | DLL4        | IFNAR1        | IFNA1       | NTRK1         | NTF5        | ACVR2B        | BMP15       |
| NOTCH3        | DLL4        | IFNAR2        | IFNA1       | NTRK2         | NTF5        | ACVR1B        | INHBA       |
| NOTCH4        | DLL4        | IFNAR2        | IFNA5       | NTRK3         | NTF5        | ACVR2         | INHBA       |
| EPHA2         | EFNA1       | IFNAR2        | IFNA16      | NGFR          | NTF5        | ACVR2B        | INHBA       |
| EPHA3         | EFNA1       | IFNAR2        | IFNA8       | PDGFRB        | PDGFB       | ACVR1B        | INHBB       |
| EPHA4         | EFNA1       | IFNAR2        | IFNA14      | FLT1          | VEGF        | ACVR2         | INHBB       |
| EPHA5         | EFNA1       | IFNAR2        | IFNA21      | KDR           | VEGF        | ACVR2B        | INHBB       |
| EPHA7         | EFNA1       | IFNAR2        | IFNA2       | NRP1          | VEGF        | ACVR1B        | INHBC       |
| EPHA8         | EFNA1       | IFNAR2        | IFNA13      | NRP2          | VEGF        | ACVR2         | INHBC       |
| EPHA2         | EFNA2       | IFNAR2        | IFNA6       | NRP1          | VEGFB       | ACVR2B        | INHBC       |
| EPHA3         | EFNA2       | IFNAR2        | IFNA7       | FLT4          | VEGFC       | ACVR1B        | INHBA       |
| EPHA4         | EFNA2       | IFNAR2        | IFNA10      | FLT4          | FIGF        | ACVR2         | INHBA       |
| EPHA5         | EFNA2       | IFNAR1        | IFNA17      | NRP1          | PGF         | ACVR2B        | INHBA       |
| EPHA7         | EFNA2       | IFNAR2        | IFNA17      | EGFR          | EGF         | CXCR1         | SCYC1       |
| EPHA8         | EFNA2       | IFNAR2        | IFNW1       | EGFR          | TGFA        | CXCR1         | SCYC2       |
| EPHA2         | EFNA3       | IFNAR2        | IFNB1       | EGFR          | AREG        | CX3CR1        | SCYD1       |
| EPHA3         | EFNA3       | IL1R2         | IL1A        | EGFR          | BTC         | CCR3          | SCYA11      |
| EPHA4         | EFNA3       | IL1R2         | IL1B        | ERBB3         | BTC         | GPR9          | SCYA11      |
| EPHA5         | EFNA3       | IL18RAP       | IL18        | ERBB4         | BTC         | CCR3          | SCYA23      |
| EPHA7         | EFNA3       | FGFR1         | FGF1        | ERBB4         | NRG1        | CCR1          | SCYA24      |
| EPHA8         | EFNA3       | FGFR2         | FGF1        | ERBB3         | NRG1        | CCR1          | SCYA14      |
| EPHA2         | EFNA4       | FGFR3         | FGF1        | ERBB2         | NRG1        | CCBP2         | SCYA14      |
| EPHA3         | EFNA4       | FGFR4         | FGF1        | EGFR          | DTR         | CCR3          | SCYA26      |
| EPHA4         | EFNA4       | FGFR1         | FGF2        | ERBB4         | DTR         | CCR1          | SCYA3       |
| EPHA5         | EFNA4       | FGFR2         | FGF2        | EGFR          | EREG        | CCR5          | SCYA3       |
| EPHA7         | EFNA4       | FGFR3         | FGF2        | ERBB4         | EREG        | CCR5          | SCYA4       |
| EPHA8         | EFNA4       | FGFR4         | FGF2        | IL6ST         | IL11        | CCR8          | SCYA4       |
| EPHA2         | EFNA5       | FGFR1         | FGF3        | IL6R          | IL6         | CCR1          | SCYA15      |
| EPHA3         | EFNA5       | FGFR2         | FGF3        | IL6ST         | IL6         | CCR3          | SCYA15      |
| EPHA4         | EFNA5       | FGFR1         | FGF4        | IL6ST         | LIF         | CCR8          | SCYA1       |
| EPHA5         | EFNA5       | FGFR2         | FGF4        | LIFR          | CTF1        | CCR7          | SCYA21      |
| EPHA7         | EFNA5       | FGFR3         | FGF4        | IL6ST         | CNTF        | GPR9          | SCYA21      |
| EPHA8         | EFNA5       | FGFR4         | FGF4        | LIFR          | CNTF        | CCR1          | SCYA5       |
| EPHB2         | EFNB1       | FGFR1         | FGF5        | IL6ST         | OSM         | CCR3          | SCYA5       |
| EPHB3         | EFNB1       | FGFR2         | FGF5        | LIFR          | OSM         | CCR4          | SCYA5       |
| EPHB4         | EFNB1       | FGFR3         | FGF5        | KIT           | SCGF        | CCR5          | SCYA5       |
| EPHB6         | EFNB1       | FGFR1         | FGF6        | FLT3          | FLT3LG      | FY            | SCYA5       |
| EPHA4         | EFNB1       | FGFR2         | FGF6        | CSF1R         | CSF1        | CCR2          | SCYA2       |
| EPHB2         | EFNB2       | FGFR4         | FGF6        | PTPRZ1        | MDK         | FY            | SCYA2       |
| EPHB3         | EFNB2       | FGFR2         | FGF7        | PTPRB         | MDK         | CCR2          | SCYA8       |
| EPHB4         | EFNB2       | FGFR2         | FGF8        | PTPRB         | PTN         | CCR3          | SCYA8       |
| EPHB6         | EFNB2       | FGFR3         | FGF8        | KIAA0468      | PTN         | CCR5          | SCYA8       |
| EPHA4         | EFNB2       | FGFR4         | FGF8        | TGFBR1        | TGFB1       | CCR1          | SCYA8       |
| EPHB2         | EFNB3       | FGFR1         | FGF9        | TGFBR2        | TGFB1       | CCBP2         | SCYA8       |
| EPHB3         | EFNB3       | FGFR2         | FGF9        | TGFBR3        | TGFB1       | GPR2          | SCYA27      |
| EPHB4         | EFNB3       | FGFR3         | FGF9        | TGFBR2        | TGFB2       | CCR1          | SCYA7       |
| EPHB6         | EFNB3       | FGFR4         | FGF9        | TGFBR3        | TGFB2       | CCR2          | SCYA7       |
| EPHA4         | EFNB3       | FGFR1         | FGF10       | TGFBR2        | TGFB3       | CCR3          | SCYA7       |
| TNFRSF1A      | TNF         | FGFR2         | FGF10       | TGFBR3        | TGFB3       | CCR5          | SCYA7       |

**Table S3. Cont.**

| Receptor gene | Ligand gene |
|---------------|-------------|---------------|-------------|---------------|-------------|---------------|-------------|
| TNFRSF1B      | TNF         | FGFR3         | FGF10       | BMPR1B        | BMP2        | CCR2          | SCYA13      |
| LTBR          | TNF         | FGFR4         | FGF10       | BMPR2         | BMP2        | CCR3          | SCYA13      |
| TNFRSF7       | TNFSF7      | FGFR1         | FGF11       | ACVR1         | BMP2        | CCR1          | SCYA13      |
| TNFRSF1B      | LTA         | FGFR2         | FGF11       | ACVR2         | BMP2        | CCR5          | SCYA13      |
| TNFRSF14      | LTA         | FGFR3         | FGF11       | ACVR2B        | BMP2        | CCR4          | SCYA17      |
| LTBR          | LTA         | FGFR4         | FGF11       | BMPR1B        | BMP3        | CCR8          | SCYA17      |
| TNFRSF8       | TNFSF8      | FGFR1         | FGF12       | BMPR2         | BMP3        | CCR6          | SCYA20      |
| LTBR          | LTB         | FGFR2         | FGF12       | ACVR1         | BMP3        | CCR7          | SCYA19      |
| TNFRSF5       | TNFSF5      | FGFR3         | FGF12       | ACVR2         | BMP3        | CCR9          | SCYA25      |
| TNFRSF6       | TNFSF6      | FGFR4         | FGF12       | ACVR2B        | BMP3        | CCR4          | SCYA22      |
| TNFRSF6B      | TNFSF6      | FGFR1         | FGF12B      | BMPR1B        | BMP4        | IL8RA         | IL8         |
| TNFRSF10B     | TNFSF10     | FGFR2         | FGF12B      | BMPR2         | BMP4        | IL8RB         | IL8         |
| TNFRSF10C     | TNFSF10     | FGFR3         | FGF12B      | ACVR1         | BMP4        | FY            | IL8         |
| TNFRSF10D     | TNFSF10     | FGFR4         | FGF12B      | ACVR2         | BMP4        | IL8RA         | SCYB6       |
| TNFRSF11B     | TNFSF10     | FGFR1         | FGF13       | ACVR2B        | BMP4        | IL8RB         | SCYB6       |
| TNFRSF11B     | TNFSF11     | FGFR2         | FGF13       | BMPR1B        | BMP5        | GPR9          | MIG         |
| TNFRSF14      | TNFSF14     | FGFR3         | FGF13       | BMPR2         | BMP5        | CXCR4         | SDF1        |
| TNFRSF6B      | TNFSF14     | FGFR4         | FGF13       | ACVR1         | BMP5        | GPR9          | SCYB11      |
| LTBR          | TNFSF14     | FGFR1         | FGF14       | ACVR2         | BMP5        | IL8RB         | SCYB5       |
| TNFRSF12      | TNFSF12     | FGFR2         | FGF14       | ACVR2B        | BMP5        | IL8RA         | SCYB5       |
| TNFRSF18      | TNFSF18     | FGFR3         | FGF14       | BMPR1B        | BMP6        | GPR9          | SCYB10      |
| IL8RB         | GRO2        | FGFR4         | FGF14       | BMPR2         | BMP6        | IL8RB         | PPBP        |
| IL8RB         | GRO3        | FGFR1         | FGF16       | ACVR1         | BMP6        | FY            | PPBP        |
| BLR1          | SCYB13      | FGFR2         | FGF16       | ACVR2         | BMP6        | IL8RB         | GRO1        |
| IL2RB         | IL2         | FGFR3         | FGF16       | ACVR2B        | BMP6        | FY            | GRO1        |
| IL2RG         | IL2         | FGFR4         | FGF16       | BMPR1B        | BMP7        |               |             |
| IL2RG         | IL7         | FGFR1         | FGF17       | BMPR2         | BMP7        |               |             |
| IL2RG         | IL9         | FGFR2         | FGF17       | ACVR1         | BMP7        |               |             |
| IL15RA        | IL15        | FGFR3         | FGF17       | ACVR2         | BMP7        |               |             |
| IL2RB         | IL15        | FGFR4         | FGF17       | ACVR2B        | BMP7        |               |             |
| IL2RG         | IL15        | FGFR1         | FGF18       | BMPR1A        | BMP8        |               |             |

**Table S4. Gene pairs that are subunits in the same receptor**

| Receptor |        | Receptor  |           | Receptor |          | Receptor |        |
|----------|--------|-----------|-----------|----------|----------|----------|--------|
| Gene 1   | Gene 2 | Gene 1    | Gene 2    | Gene 1   | Gene 2   | Gene 1   | Gene 2 |
| NOTCH1   | NOTCH2 | EPHB2     | EPHB6     | IL13RA2  | IL2RG    | BMPR1A   | ACVR2B |
| NOTCH1   | NOTCH3 | EPHB2     | EPHA4     | IFNGR1   | IFNGR2   | BMPR1B   | BMPR2  |
| NOTCH1   | NOTCH4 | EPHB3     | EPHB4     | IFNAR1   | IFNAR2   | BMPR1B   | ACVR1  |
| NOTCH2   | NOTCH3 | EPHB3     | EPHB6     | FGFR1    | FGFR2    | BMPR1B   | ACVR2  |
| NOTCH2   | NOTCH4 | EPHB3     | EPHA4     | FGFR1    | FGFR3    | BMPR1B   | ACVR2B |
| NOTCH3   | NOTCH4 | EPHB4     | EPHB6     | FGFR1    | FGFR4    | BMPR2    | ACVR1  |
| EPHA1    | EPHA3  | EPHB4     | EPHA4     | FGFR2    | FGFR3    | BMPR2    | ACVR2  |
| EPHA1    | EPHA4  | EPHB6     | EPHA4     | FGFR2    | FGFR4    | BMPR2    | ACVR2B |
| EPHA1    | EPHA5  | TNFRSF1A  | LTBR      | FGFR3    | FGFR4    | ACVR1    | ACVR2  |
| EPHA1    | EPHA7  | TNFRSF1B  | LTBR      | NTRK1    | NGFR     | ACVR1    | ACVR2B |
| EPHA1    | EPHA8  | TNFRSF1A  | TNFRSF14  | NTRK1    | NTRK2    | ACVR2    | ACVR2B |
| EPHA2    | EPHA3  | TNFRSF1B  | TNFRSF14  | NTRK1    | NTRK3    | ACVR1B   | ACVR2  |
| EPHA2    | EPHA4  | TNFRSF14  | LTBR      | NTRK2    | NTRK3    | ACVR1B   | ACVR2B |
| EPHA2    | EPHA5  | TNFRSF6   | TNFRSF6B  | NTRK3    | NGFR     | CCR3     | GPR9   |
| EPHA2    | EPHA7  | TNFRSF10A | TNFRSF10C | FLT1     | NRP2     | CCR7     | GPR9   |
| EPHA2    | EPHA8  | TNFRSF10A | TNFRSF10D | KDR      | NRP1     | CCR1     | CCR4   |
| EPHA3    | EPHA4  | TNFRSF10A | TNFRSF11B | KDR      | NRP2     | CCR1     | FY     |
| EPHA3    | EPHA5  | TNFRSF10B | TNFRSF10C | NRP1     | NRP2     | CCR3     | CCR4   |
| EPHA3    | EPHA7  | TNFRSF10B | TNFRSF10D | EGFR     | ERBB3    | CCR3     | CCR5   |
| EPHA3    | EPHA8  | TNFRSF10B | TNFRSF11B | EGFR     | ERBB4    | CCR3     | FY     |
| EPHA4    | EPHA5  | TNFRSF10C | TNFRSF10D | ERBB4    | ERBB2    | CCR4     | CCR5   |
| EPHA4    | EPHA7  | TNFRSF10C | TNFRSF11B | ERBB3    | ERBB2    | CCR4     | FY     |
| EPHA4    | EPHA8  | TNFRSF10D | TNFRSF11B | IL6R     | IL6ST    | CCR5     | FY     |
| EPHA5    | EPHA7  | TNFRSF14  | TNFRSF6B  | CNTFR    | LIFR     | CCR2     | FY     |
| EPHA5    | EPHA8  | TNFRSF6B  | LTBR      | OSMR     | LIFR     | CCR2     | CCR5   |
| EPHA7    | EPHA8  | IL2RA     | IL2RG     | PTPRZ1   | KIAA0468 | CCR2     | CCBP2  |
| EPHB1    | EPHB3  | IL2RB     | IL2RG     | PTPRB    | KIAA0468 | CCR3     | CCBP2  |
| EPHB1    | EPHB4  | IL15RA    | IL2RB     | TGFBR1   | TGFBR3   | CCR5     | CCBP2  |
| EPHB1    | EPHB6  | IL15RA    | IL2RG     | TGFBR2   | TGFBR3   | IL8RA    | IL8RB  |
| EPHB1    | EPHA4  | IL4R      | IL13RA1   | BMPR1A   | BMPR2    | IL8RA    | FY     |
| EPHB2    | EPHB3  | IL2RG     | IL13RA1   | BMPR1A   | ACVR1    | IL8RB    | FY     |
| EPHB2    | EPHB4  | IL13RA2   | IL4R      | BMPR1A   | ACVR2    |          |        |

**Table S5. Phylogenetic and coexpression measures for validated GPCR-RAMP interacting pairs**

| GPCR   | Interacting RAMP | Coexpression |      | Shared species |      | Phylogenetic |           |           |              |
|--------|------------------|--------------|------|----------------|------|--------------|-----------|-----------|--------------|
|        |                  | C.C.         | Rank | Percent        | Rank | C.C.         | C.C. Rank | C.P.      | C.P. Rank    |
| CALCRL | RAMP1            | 0.2          | 106  | 43.66          | 151  | 0.93         | 62        | 0         | 1 (18 zeros) |
| CALCRL | RAMP2            | 0.83         | 2    | 32.85          | 276  | 0.9          | 88        | 7.39E-115 | 27           |
| CALCRL | RAMP3            | 0.82         | 1    | 52.11          | 151  | 0.94         | 35        | 0         | 1 (55 zeros) |
| CALCR  | RAMP1            | 0.1          | 178  | 33.92          | 227  | 0.86         | 198       | 8.66E-63  | 213          |
| CALCR  | RAMP2            | 0.07         | 196  | 57.14          | 50   | 0.83         | 235       | 6.47E-70  | 136          |
| CALCR  | RAMP3            | 0.17         | 165  | 44.64          | 211  | 0.89         | 206       | 2.49E-144 | 202          |
| CASR   | RAMP1            | -0.2         | 695  | 55.73          | 46   | 0.91         | 122       | 2.3E-232  | 25           |
| CASR   | RAMP3            | -0.06        | 600  | 68.33          | 20   | 0.94         | 54        | 0         | 1 (55 zeros) |
| CRHR1  | RAMP2            | -0.4         | 756  | NA             | NA   | NA           | NA        | NA        | NA           |
| GCGR   | RAMP2            | 0.22         | 143  | 36.84          | 260  | 0.83         | 238       | 8.72E-29  | 273          |
| GPBR1  | RAMP3            | 0.07         | 274  | 61.40          | 71   | 0.95         | 24        | 0         | 1 (18 zeros) |
| PTH1R  | RAMP2            | 0.37         | 82   | 41.5           | 221  | 0.8          | 265       | 1.03E-61  | 166          |
| PTH2R  | RAMP3            | -0.15        | 282  | 55.55          | 129  | 0.93         | 57        | 4.78E-211 | 137          |
| SCTR   | RAMP3            | 0.37         | 79   | 37.25          | 274  | 0.93         | 76        | 3.7E-117  | 221          |
| SCTR   | RAMP3            | 0.37         | 75   | 37.25          | 254  | 0.92         | 82        | 3.68E-117 | 220          |
| VIPR1  | RAMP1            | -0.16        | 336  | 21.05          | 299  | 0.99         | 1         | 6.51E-38  | 269          |
| VIPR1  | RAMP2            | 0.09         | 189  | 8.82           | 335  | 0.87         | 175       | 2.26E-84  | 79           |
| VIPR1  | RAMP3            | 0.01         | 215  | 13.04          | 329  | 0.9          | 173       | 2.14E-272 | 86           |
| VIPR2  | RAMP1            | 0.73         | 1    | 10.25          | 330  | 0.99         | 1         | 6.51E-38  | 269          |
| VIPR2  | RAMP2            | 0.3          | 115  | 6.25           | 338  | 0.87         | 175       | 2.26E-84  | 79           |
| VIPR2  | RAMP3            | 0.34         | 92   | 8.88           | 333  | 0.9          | 173       | 2.14E-272 | 86           |

Measures are based on refs. 2, 4, 5, and 23. C.C., correlation coefficient; C.P., correlation *P* value; NA, cases of GPCR-RAMP pairs that had less than five shared species. As noted in *Results*, phylogenetic measures were only calculated for GPCR-RAMP pairs that had more than five shared species.

**Dataset S1. Analyzed GPCRs, excluding olfactory GPCRs, including gene information, gene family information and the full measurements reported in the study**

[Dataset S1](#)

Shown are GPCRs that were represented in both the OMA and GTEx databases and, in a separate spread sheet, those that were only represented in the GTEx database.
